# Supplementary material
Source: HighWire-hosted journal article supplement (https://www.cmajopen.ca/highwire/filestream/80897/field_highwire_adjunct_files/0/open-2014-0006-01-at.pdf)
Supplement: open-2014-0006-01-at.pdf [file open-2014-0006-01-at.pdf]

**Appendix 1 (as supplied by the authors): Sensitivity, Specificity, Positive Predictive Value (PPV), Negative Predictive Value (NPV), Accuracy and Kappa of Administrative Claims Case Definitions for Chronic Dialysis as Compared to Manitoba Renal Program (MRP) Dialysis Registry (January 2004–December 2010)**

| No. Physician Claims                    | Other conditions <sup>a</sup> | Sensitivity (95% CI)    | Specificity (95% CI)    | PPV (95% CI)            | NPV (95% CI)            | Accuracy                | Kappa                |
|-----------------------------------------|-------------------------------|-------------------------|-------------------------|-------------------------|-------------------------|-------------------------|----------------------|
| ≥ 1                                     | 1-year data                   | 76.97<br>(74.74, 79.2)  | 93.81<br>(90.79, 92.94) | 85.19<br>(83.21, 87.17) | 89.8<br>(88.74, 90.87)  | 88.49<br>(87.36, 89.61) | 0.73<br>(0.7, 0.75)  |
| ≥ 1                                     | 3-years data                  | 74.04<br>(72.17, 75.91) | 92.48 (91.79, 93.17)    | 78.62 (76.82, 80.42)    | 90.51 (89.76, 91.27)    | 87.47 (86.61, 88.32)    | 0.68 (0.66, 0.70)    |
| ≥ 1                                     | 5-years data                  | 87.64<br>(86.34, 88.95) | 91.33<br>(90.73, 91.93) | 74.41<br>(72.82, 76.00) | 96.25<br>(95.84, 96.67) | 90.51<br>(89.87, 91.15) | 0.74<br>(0.73, 0.76) |
| ≥ 1                                     | 7-years data                  | 97.3<br>(96.68, 97.93)  | 89.67<br>(89.08, 90.26) | 70.2<br>(68.69, 71.71)  | 99.25<br>(99.08, 99.43) | 91.2<br>(90.62, 91.77)  | 0.76<br>(0.75, 0.77) |
| ≥ 2                                     | 1-year data                   | 74.63<br>(72.33, 76.94) | 94.39<br>(93.56, 95.22) | 86.02<br>(84.04, 87.99) | 88.94<br>(87.84, 90.04) | 88.14<br>(87.01, 89.27) | 0.72<br>(0.69, 0.74) |
| ≥ 2                                     | 3-years data                  | 72.71<br>(70.81, 74.61) | 94.23<br>(93.63, 94.84) | 82.48<br>(80.76, 84.21) | 90.24<br>(89.49, 91.00) | 88.38<br>(87.56, 89.20) | 0.70<br>(0.68, 0.71) |
| ≥ 2                                     | 5-years data                  | 86.05<br>(84.58, 87.42) | 93.38<br>(92.86, 93.91) | 78.91<br>(77.36, 80.45) | 95.88<br>(95.45, 96.31) | 91.75<br>(91.15, 92.34) | 0.82<br>(0.81, 0.83) |
| ≥ 2                                     | 7-years data                  | 95.55<br>(94.75, 96.34) | 91.79<br>(91.26, 92.32) | 74.43<br>(72.94, 75.92) | 98.8<br>(98.58, 99.02)  | 92.54<br>(92.01, 93.07) | 0.79<br>(0.78, 0.8)  |
| ≥ 2, at least 90 days apart             | 1-year data                   | 64.77<br>(62.23, 67.30) | 97.13<br>(96.52, 97.73) | 91.25<br>(89.47, 93.02) | 85.63<br>(84.44, 86.82) | 86.89<br>(85.75, 88.03) | 0.67<br>(0.65, 0.70) |
| ≥ 2, at least 90 days apart             | 3-years data                  | 60.87<br>(58.79, 62.95) | 99.75<br>(99.62, 99.88) | 98.92<br>(98.36, 99.48) | 87.22<br>(86.41, 88.04) | 89.18<br>(88.42, 89.94) | 0.69<br>(0.67, 0.71) |
| ≥ 2, at least 90 days apart             | 5-years data                  | 72.02<br>(70.25, 73.80) | 99.65<br>(99.52, 99.77) | 98.33<br>(97.74, 98.92) | 92.53<br>(91.99, 93.07) | 93.48<br>(92.97, 93.98) | 0.79<br>(0.78, 0.81) |
| ≥ 2, at least 90 days apart             | 7-years data                  | 83.00<br>(81.55, 84.46) | 98.65<br>(98.43, 98.87) | 93.90<br>(92.91, 94.89) | 95.87<br>(95.49, 96.25) | 95.52<br>(95.12, 95.92) | 0.85<br>(0.84, 0.87) |
| ≥ 2, lasted >90 days, no gaps > 21 days | 1-year data                   | 52.7<br>(50.06, 55.35)  | 97.5<br>(96.93, 98.06)  | 90.69<br>(88.67, 92.71) | 81.67<br>(80.4, 82.95)  | 83.33<br>(82.1, 84.56)  | 0.57<br>(0.54, 0.59) |
| ≥ 2, lasted >90 days, no gaps > 21 days | 3-years data                  | 45.19<br>(43.07, 47.31) | 99.82<br>(99.71, 99.93) | 98.96<br>(98.32, 99.60) | 82.99<br>(82.09, 83.88) | 84.97<br>(84.12, 85.52) | 0.54<br>(0.52, 0.56) |
| ≥ 2, lasted >90 days, no gaps > 21 days | 5-years data                  | 47.59<br>(45.62, 49.57) | 99.77<br>(99.66, 99.87) | 98.32<br>(97.58, 99.05) | 86.87<br>(86.21, 87.54) | 88.11<br>(87.47, 88.75) | 0.58<br>(0.56, 0.60) |
| ≥ 2, lasted >90 days, no gaps > 21 days | 7-years data                  | 50.64<br>(48.71, 52.58) | 99<br>(98.81, 99.2)     | 92.7<br>(91.34, 94.07)  | 88.91<br>(88.34, 89.49) | 89.93<br>(88.76, 89.89) | 0.6<br>(0.58, 0.62)  |

Note: <sup>a</sup> 2010, 2004-2006, 2004-2008, and 2004-2010 Physician and MRP data were used for the 1-year, 3-year, 5-year, and 7-year data agreement analysis, respectively.
